# Supplementary material
Source: publisher figshare collection journal article supplement (https://gsapubs.figshare.com/ndownloader/files/22409742)
Supplement: Supplementary file 1 [file 22409742]

## Sheet: Sheet1
McLelland, J., Chiarenzelli, J., and McLelland, J., 2016, The intrusion breccia in the valley of Roaring Brook, Giant Mountain, Adirondack Highlands, New York: A modern interpretation: Geosphere, v. 12, doi:10.1130/GES01260.1.
	Supplemental Table 1. X-ray Fluorescence Analyses of Roaring Brook Enclaves.
	OXIDE	7182A	7185C	71821B	IB1AB	MAXII	7185B1	7185B	7185B	RSVB1	7189	7186C	7185C2	71821B	1B1AB	MAFX2	7186C	7185C	71821B	7185B2	7185B3	71886A
	SiO2	55.28	54.15	53.03	55.05	57.05	56.1	54.83	57.22	53.8	53.49	55.2	53.15	53.83	55.83	57.05	55.28	53.15	53.83	56.12	54.83	57.22
	TiO2	0.65	0.56	0.84	0.84	0.12	0.6	0.64	0.69	0.2	1.44	0.17	0.65	0.96	0.64	0.79	0.68	0.96	0.94	0.79	0.6	0.77
	Al2O3	12.54	14.45	11.46	10.97	12.96	12.95	12.75	12.92	14.32	12.96	12.54	13.05	12.96	10.97	12.96	12.54	13.05	12.96	12.97	12.73	12.82
	FeOtot	7.75	7.75	14.48	8.6	6.7	7.1	7.33	6.56	9.86	12.24	7.73	14.45	11.4	8.06	6.7	7.72	14.48	11.4	7.1	7.33	6.54
	MnO	0.13	0.27	0.25	0.31	0.12	0.17	0.1	0.3	0.01	0.27	0.13	0.27	0.25	0.31	0.12	0.14	0.27	0.25	0.17	0.17	0.1
	MgO	5.56	4.31	4.83	6.35	6.31	5.9	5.85	5.86	5.85	3.6	5.56	4.31	4.83	6.45	6.02	5.56	4.31	4.83	5.9	5.65	5.58
	CaO	10.04	9.86	10.66	10.97	9.18	11.34	11.26	10	10.57	9.14	10.06	9.86	10.66	10.78	9.1	10.56	9.85	10.66	11.34	11.26	10
	Na2O	3.03	3.42	3.42	3.47	3.01	2.98	3.12	3.15	3.31	2.94	3.03	3.42	3.37	2.59	3.02	3.03	3.42	3.37	2.95	3.12	3.08
	K2O	2.64	3.01	1.32	2.7	3.61	2.32	2.67	3.13	0.7	2.64	3.1	0.59	1.34	2.7	3.61	3.01	0.89	1.35	2.35	2.37	3.13
	P2O5	0.17	0.25	0.23	0.2	0.1	0.1	0.23	0.21	0.2	0.43	0.17	0.25	0.23	0.2	0.2	0.17	0.28	0.23	0.15	0.17	0.1
	LOI	0.7	0.3	0.3	0.4	0.22	0.01	0.33	0.23	0.01	0.01	0.7	0.3	0.3	0.4	0.25	0.76	0.32	0.3	0.01	0.33	0.23
	TOTAL	98.49	98.33	100.82	99.86	99.38	99.57	99.11	100.27	98.83	99.16	98.39	100.3	100.13	98.93	99.82	99.45	100.98	100.12	99.85	98.56	99.57
